# Supplementary material for: Myeloid cell replacement is neuroprotective in chronic experimental autoimmune encephalomyelitis
Source: Springer Nature journal article supplement (doi:10.1038/s41593-024-01609-3), 2024-03-21
Supplement: 41593_2024_1609_MOESM1_ESM.pdf [file 41593_2024_1609_MOESM1_ESM.pdf]

---

# Myeloid cell replacement is neuroprotective in chronic experimental autoimmune encephalomyelitis

---

In the format provided by the authors and unedited

---

Supplementary File 1: DNA sequence of GFP derived from C57BL/6-Tg(UBC-GFP)30Scha/J

Genomic map of the Ubc-GFP locus with PCR primers showing aligned reads of Sanger sequencing. Created with SnapGene software (www.snapgene.com).

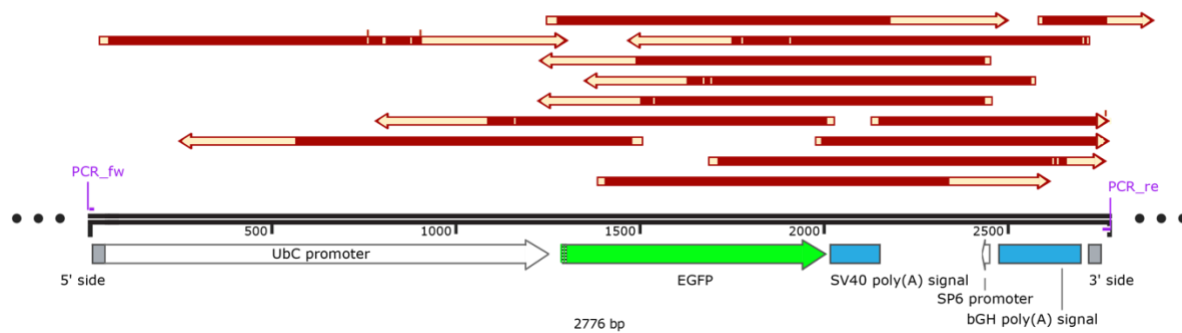

Nucleotide sequence of the Ubc-GFP locus. The sequence, which was used for mapping of the NucSeq data, is highlighted in yellow. The GFP sequence is shown in green letters.

```
CTTTAGTTGCAAGGTTTCTGGGAAAGTAAAAATTCTTCTCTTTTACTGGCCTCCGCGCCGGGTTTTGGC
GCCTCCC GCGGGCGCCCCCTCTCACGGCGAGCGTGCCACGTCAGACGAAGGGCGCAGCGAGCGTC
CTGATCCTTCCGCCCGGACGCTCAGGACAGCGGCCCGTGCTCATAAGACTCGGCCTTAGAACCCAGT
ATCAGCAGAAGGACATTTTAGGACGGGACTTGGGTGACTCTAGGGCACTGGTTTTCTTCCAGAGAGCG
GAACAGGGCAGGAAAAGTAGTCCCTTCTCGGCGATTCTGCGGAGGGATCTCCGTGGGGCGGTGAACGC
CGATGATTATATAAGGACGCGCCGGGTGTGGCACAGCTAGTTCGGTTCGCAGCCGGGATTTGGGTCGCG
GTTCTTGTGGTGGATCGCTGTGATCGTCACTTGGTGAGTAGCGGGCTGCTGGGCTGGCCGGGGCTTTC
GTGGCCGCGGGCCGCTCGGTGGGACGGAAGCGTGTGGAGAGACCGCCAAGGGCTGTAGTCTGGGTC
CGCGAGCAAGGTTGCCCTGAACTGGGGGTTGGGGGAGCGCAGCAAATGGCGGCTGTTCCCGAGTCT
TGAATGGAAGACGCTTGTGAGGCGGGCTGTGAGGTCGTTGAAACAAGGTGGGGGGCATGGTGGGCGG
CAAGAACCCAAGGTCTTGAGGCCTTCGCTAATGCGGGAAAGCTCTTATTCGGGTGAGATGGGCTGGGG
CACCATCTGGGGACCCTGACGTGAAGTTTGTCACTGACTGGAGAACTCGGTTTGTCTGTGTTGCGGGG
GCGGCAGTTATGGCGGTGCCGTTGGGCAGTGCACCCGTACCTTTGGGAGCGCGGCCCTCGTCGTGTC
GTGACGTACCCGTTCTGTTGGCTTATAATGCAGGGTGGGGCCACCTGCCGGTAGGTGTGCGGTAGGCT
TTTCTCCGTCGCAGGACGCAGGGTTCGGGCCTAGGGTAGGCTCTCCTGAATCGACAGGCGCCGGACCTC
TGGTGAGGGGAGGGATAAGTGAGGCGTCAGTTTCTTTGGTCGGTTTTATGTACCTATCTTCTTAAGTAG
CTGAAGCTCCGTTTTGAACTATGCGCTCGGGGTTGGCGAGTGTTTTTGTGAAGTTTTTTAGGCACCTT
TTGAAATGTAATCATTTGGGTCAATATGTAATTTTCAGTGTTAGACTAGTAAATTGTCCGCTAAATTCTGG
CCGTTTTTGGCTTTTTTGTAGACGAAGCTTCGAATTGATCCACCGGTCGCCACCATGGTGAGCAAGGGC
GAGGAGCTGTTACCGGGGTGGTGCCCATCCTGGTCGAGCTGGACGGCGACGTAAACGGCCACAAGTT
CAGCGTGTCCGGCGAGGGCGAGGGCGATGCCACCTACGGCAAGCTGACCCTGAAGTTCATCTGCACCA
CCGGCAAGCTGCCCGTGCCTGGCCACCCTCGTGACCACCCTGACCTACGGCGTGCAAGTCTCAGCC
GCTACCCCGACCACATGAAGCAGCAGACTTCTTCAAGTCCGCCATGCCCGAGGGCTACGTCCAGGAGC
```

GCACCATCTCCTTCAAGGACGACGGCAACTACAAGACCCGCGCCGAGGTGAAGTTCGAGGGCGACACC  
CTGGTGAACCGCATCGAGCTGAAGGGCATCGACTTCAAGGAGGACGGCAACATCCTGGGGCACAAGCT  
GGAGTACAACACTACAACAGCCACAACGTCTATATCACCGCCGACAAGCAGAAGAACGGCATCAAGGCCA  
ACTTCAAGATCCGCCACAACATCAAGGACGGCAGCGTGCAGCTCGCCGACCACTACCAGCAGAACACCC  
CCATCGGGCAGCGCCCCGTGCTGCTGCCCCGACAACCACTACCTGAGCACCCAGTCCGCCCTGAGCAAAG  
ACCCCAACGAGAAGCGCGATCACATGGTCCTGCTGGAGTTCGTGACCGCCGCGGGATCACTCTCGGCA  
TGGACGAGCTGTACAAGTAAAGCGGCCGCGATCCAGACATGATAAGATACATTGATGAGTTTGGACAA  
ACCACAAC TAGAATGCAGTGAAAAAATGCTTTATTTGTGAAATTTGTGATGCTATTGCTTTATTTGTAAC  
CATTATAAGCTGCAATAAACAAGTTAACAACAACAATTGCATTCATTTTATGTTTCAGGTT CAGGGGGAG  
GTGTGGGAGGTTTTTTAAAGCAAGTAAAACCTCTACAAATGTGGTATGGCTGATTATGATCCGGCTGCCT  
CGCGCGTTTTCGGTGATGACGGTGAAAACCTCTGACACATGCAGCTCCCGGAGACGGTCACAGCTTGTCT  
GTAAGCGGATGCCGGGAGCAGACAAGCCCGTCAGGGCGCGTCAGCGGGTGTGGCGGGTGTGGGGC  
GCAGCCATGAGGTGAGGGGGGGCCCTATTCTATAGTGTACCTAAATGCTAGAGCTCGCTGATCAGCC  
TCGACTGTGCCTTCTAGTTGCCAGCCATCTGTTGTTTGCCCCTCCCCGTGCCTTCCTTGACCCTGGAAGG  
TGCCACTCCCACTGTCTTTTCTAATAAAAATGAGGAAATTGCATCGCATTGTCTGAGTAGGTGTCATTCTA  
TTCTGGGAGGTGGGGTGGGGCAGGACAGCAAGGGGGAGGATTGGGAAGACAATAGCAGGCATGCTG  
GGGATGCGGTGGGCTCTATGGCTTCTGAGGCGGAAAGAACCA GGGGAAGTGGGATTTATGAAGTCAG  
AAAACCCTACGCACAGGAAAGTTGAT
